# Supplementary material for: Behavior of interactions between hydrogen chalcogenides and an anthracene π-system elucidated by QTAIM dual functional analysis with QC calculations
Source: Royal Society of Chemistry journal article supplement (doi:10.1039/c7ra04224h), 2017-01-01
Supplement: c7ra04224h1.pdf [file c7ra04224h1.pdf]

## Electronic Supplementary Information

### Behavior of Interactions Between Hydrogen Chalcogenides and Anthracene $\pi$ -System, Elucidated by QTAIM Dual Functional Analysis with QC Calculations

Satoko Hayashi,\* Yuji Sugibayashi and Waro Nakanishi\*

Department of Material Science and Chemistry, Faculty of Systems Engineering, Wakayama University, 930 Sakaedani, Wakayama, 640-8510 Japan

E-mail: hayashi3@sys.wakayama-u.ac.jp and nakanisi@sys.wakayama-u.ac.jp

#### QTAIM Dual Functional Analysis (QTAIM-DFA)

The bond critical point (BCP; \*) is an important concept in QTAIM. The BCP of  $(\omega, \sigma) = (3, -1)$ <sup>S1</sup> is a point along the bond path (BP) at the interatomic surface, where charge density  $\rho(\mathbf{r})$  reaches a minimum. It is denoted by  $\rho_b(\mathbf{r}_c)$ . While the chemical bonds or interactions between A and B are denoted by A–B, which correspond to BPs between A and B in QTAIM, A-\*–B emphasizes the presence of BCP (\*) in A–B.

The sign of the Laplacian  $\rho_b(\mathbf{r}_c)$  ( $\nabla^2\rho_b(\mathbf{r}_c)$ ) indicates that  $\rho_b(\mathbf{r}_c)$  is depleted or concentrated with respect to its surrounding, since  $\nabla^2\rho_b(\mathbf{r}_c)$  is the second derivative of  $\rho_b(\mathbf{r}_c)$ .  $\rho_b(\mathbf{r}_c)$  is locally depleted relative to the average distribution around  $\mathbf{r}_c$  if  $\nabla^2\rho_b(\mathbf{r}_c) > 0$ , but it is concentrated when  $\nabla^2\rho_b(\mathbf{r}_c) < 0$ . Total electron energy densities at BCPs ( $H_b(\mathbf{r}_c)$ ) must be a more appropriate measure for weak interactions on the energy basis.<sup>S1-S6</sup>  $H_b(\mathbf{r}_c)$  are the sum of kinetic energy densities ( $G_b(\mathbf{r}_c)$ ) and potential energy densities ( $V_b(\mathbf{r}_c)$ ) at BCPs, as shown in eqn (S1). Electrons at BCPs are stabilized when  $H_b(\mathbf{r}_c) < 0$ , therefore, interactions exhibit the covalent nature in this region, whereas they exhibit no covalency if  $H_b(\mathbf{r}_c) > 0$ , due to the destabilization of electrons at BCPs under the conditions.<sup>S1</sup> Eqn (S2) represents the relation between  $\nabla^2\rho_b(\mathbf{r}_c)$  and  $H_b(\mathbf{r}_c)$ , together with  $G_b(\mathbf{r}_c)$  and  $V_b(\mathbf{r}_c)$ , which is closely related to the virial theorem.

$$H_b(\mathbf{r}_c) = G_b(\mathbf{r}_c) + V_b(\mathbf{r}_c) \quad (\text{S1})$$

$$(\hbar^2/8m)\nabla^2\rho_b(\mathbf{r}_c) = H_b(\mathbf{r}_c) - V_b(\mathbf{r}_c)/2 \quad (\text{S2})$$

$$= G_b(\mathbf{r}_c) + V_b(\mathbf{r}_c)/2 \quad (\text{S2}')$$

Interactions are classified by the signs of  $\nabla^2\rho_b(\mathbf{r}_c)$  and  $H_b(\mathbf{r}_c)$ . Interactions in the region of  $\nabla^2\rho_b(\mathbf{r}_c) < 0$  are called shared-shell (SS) interactions and they are closed-shell (CS) interactions for  $\nabla^2\rho_b(\mathbf{r}_c) > 0$ .  $H_b(\mathbf{r}_c)$  must be negative when  $\nabla^2\rho_b(\mathbf{r}_c) < 0$ , since  $H_b(\mathbf{r}_c)$  are larger than  $(\hbar^2/8m)\nabla^2\rho_b(\mathbf{r}_c)$  by  $V_b(\mathbf{r}_c)/2$  with negative  $V_b(\mathbf{r}_c)$  at all BCPs (eqn (S2)). Consequently,  $\nabla^2\rho_b(\mathbf{r}_c) < 0$  and  $H_b(\mathbf{r}_c) < 0$  for the SS interactions. The CS interactions are especially called *pure* CS interactions for  $H_b(\mathbf{r}_c) > 0$  and  $\nabla^2\rho_b(\mathbf{r}_c) > 0$ , since electrons at BCPs are depleted and destabilized under the conditions.<sup>S1a</sup> Electrons in the intermediate region between SS and *pure* CS, which belong to CS, are locally depleted but stabilized

at BCPs, since  $\nabla^2\rho_b(\mathbf{r}_c) > 0$  but  $H_b(\mathbf{r}_c) < 0$ .<sup>S1a</sup> We call the interactions in this region *regular* CS,<sup>S4,S5</sup> when it is necessary to distinguish from *pure* CS. The role of  $\nabla^2\rho_b(\mathbf{r}_c)$  in the classification can be replaced by  $H_b(\mathbf{r}_c) - V_b(\mathbf{r}_c)/2$ , since  $(\hbar^2/8m)\nabla^2\rho_b(\mathbf{r}_c) = H_b(\mathbf{r}_c) - V_b(\mathbf{r}_c)/2$  (eqn (S2)).

We proposed QTAIM-DFA by plotting  $H_b(\mathbf{r}_c)$  versus  $H_b(\mathbf{r}_c) - V_b(\mathbf{r}_c)/2 (= (\hbar^2/8m)\nabla^2\rho_b(\mathbf{r}_c))$ ,<sup>S4a</sup> after the proposal of  $H_b(\mathbf{r}_c)$  versus  $\nabla^2\rho_b(\mathbf{r}_c)$ .<sup>S4b</sup> Both axes in the plot of the former are given in energy unit, therefore, distances on the  $(x, y) (= (H_b(\mathbf{r}_c) - V_b(\mathbf{r}_c)/2, H_b(\mathbf{r}_c)))$  plane can be expressed in the energy unit, which provides an analytical development. QTAIM-DFA can incorporate the classification of interactions by the signs of  $\nabla^2\rho_b(\mathbf{r}_c)$  and  $H_b(\mathbf{r}_c)$ . Scheme S1 summarizes the QTAIM-DFA treatment. Interactions of *pure* CS appear in the first quadrant, those of *regular* CS in the fourth quadrant and SS interactions do in the third quadrant. No interactions appear in the second one.

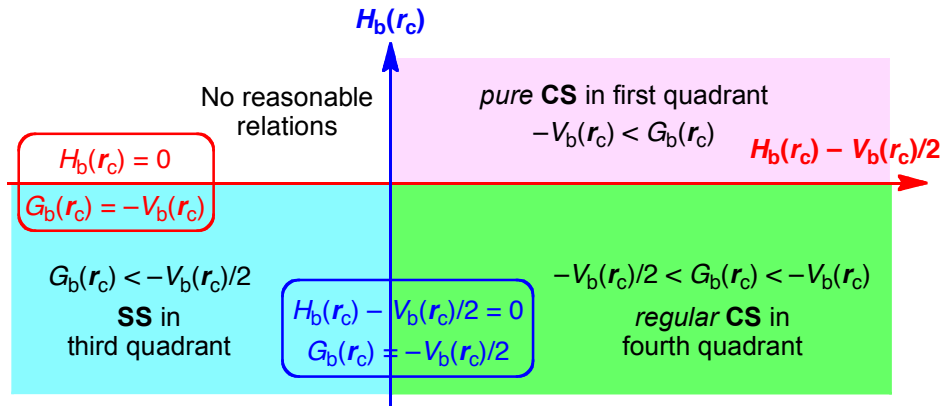

**Scheme S1.** QTAIM-DFA: Plot of  $H_b(\mathbf{r}_c)$  versus  $H_b(\mathbf{r}_c) - V_b(\mathbf{r}_c)/2$  for Weak to Strong Interactions

In our treatment, data for perturbed structures around fully optimized structures are also employed for the plots, together with the fully optimized ones (see Figure S1).<sup>S4,S6</sup> We proposed the concept of the "dynamic nature of interaction" originated from the perturbed structures. The behavior of interactions at the fully optimized structures corresponds to "the static nature of interactions", whereas that containing perturbed structures exhibit the "dynamic nature of interaction" as explained below. The method to generate the perturbed structures is discussed later. Plots of  $H_b(\mathbf{r}_c)$  versus  $H_b(\mathbf{r}_c) - V_b(\mathbf{r}_c)/2$  are analyzed employing the polar coordinate  $(R, \theta)$  representation with  $(\theta_p, \kappa_p)$  parameters.<sup>S4a,S5,S6</sup> Figure S1 explains the treatment.  $R$  in  $(R, \theta)$  is defined by eqn (S3) and given in the energy unit.  $R$  corresponds to the energy for an interaction at BCP. The plots show a spiral stream, as a whole.  $\theta$  in  $(R, \theta)$  defined by eqn (S4), measured from the  $y$ -axis, controls the spiral stream of the plot. Each plot for an interaction shows a specific curve, which provides important information of the interaction (see Figure S1). The curve is expressed by  $\theta_p$  and  $\kappa_p$ . While  $\theta_p$ , defined by eqn (S5) and measured from the  $y$ -direction, corresponds to the tangent line of a plot, where  $\theta_p$  is calculated employing data of the perturbed structures with a fully-optimized structure and  $\kappa_p$  is the curvature of the plot (eqn (S6)). While  $(R, \theta)$  correspond to the static nature,  $(\theta_p, \kappa_p)$  represent the dynamic nature of interactions. We call  $(R, \theta)$  and  $(\theta_p, \kappa_p)$  QTAIM-DFA parameters, whereas  $\rho_b(\mathbf{r}_c)$ ,  $\nabla^2\rho_b(\mathbf{r}_c)$ ,  $G_b(\mathbf{r}_c)$ ,  $V_b(\mathbf{r}_c)$ ,  $H_b(\mathbf{r}_c)$  and  $H_b(\mathbf{r}_c) - V_b(\mathbf{r}_c)/2$  belong to QTAIM functions.  $k_b(\mathbf{r}_c)$ , defined by eqn (S7), is an QTAIM function but it will be treated as if it were an QTAIM-DFA parameter, if suitable.

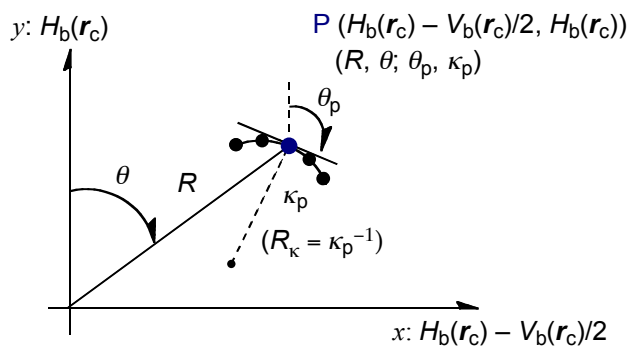

**Figure S1.** Polar  $(R, \theta)$  coordinate representation of  $H_b(\mathbf{r}_c)$  versus  $H_b(\mathbf{r}_c) - V_b(\mathbf{r}_c)/2$ , with  $(\theta_p, \kappa_p)$  parameters.

$$R = (x^2 + y^2)^{1/2} \quad (\text{S3})$$

$$\theta = 90^\circ - \tan^{-1}(y/x) \quad (\text{S4})$$

$$\theta_p = 90^\circ - \tan^{-1}(dy/dx) \quad (\text{S5})$$

$$\kappa_p = |d^2y/dx^2|/[1 + (dy/dx)^2]^{3/2} \quad (\text{S6})$$

$$k_b(\mathbf{r}_c) = V_b(\mathbf{r}_c)/G_b(\mathbf{r}_c) \quad (\text{S7})$$

where  $(x, y) = (H_b(\mathbf{r}_c) - V_b(\mathbf{r}_c)/2, H_b(\mathbf{r}_c))$

### Criteria for Classification of Interactions: Behavior of Typical Interactions Elucidated by QTAIM-DFA

$H_b(\mathbf{r}_c)$  are plotted versus  $H_b(\mathbf{r}_c) - V_b(\mathbf{r}_c)/2$  for typical interactions in vdW (van der Waals interactions), HB (hydrogen bonds), CT-MC (molecular complexes through charge transfer),  $X_3^-$  (trihalide ions), CT-TBP (trigonal bipyramidal adducts through charge-transfer), Cov-w (weak covalent bonds) and Cov-s (strong covalent bonds).<sup>S4-S6</sup> Rough criteria are obtained, after the analysis of the plots for the typical interactions according to eqns (S3)–(S7), by applying QTAIM-DFA. Scheme S2 shows the rough criteria, which are accomplished by the  $\theta$  and  $\theta_p$  values, together with the values of  $k_b(\mathbf{r}_c)$ . The criteria will be employed to discuss the nature of interactions in question, as a reference.

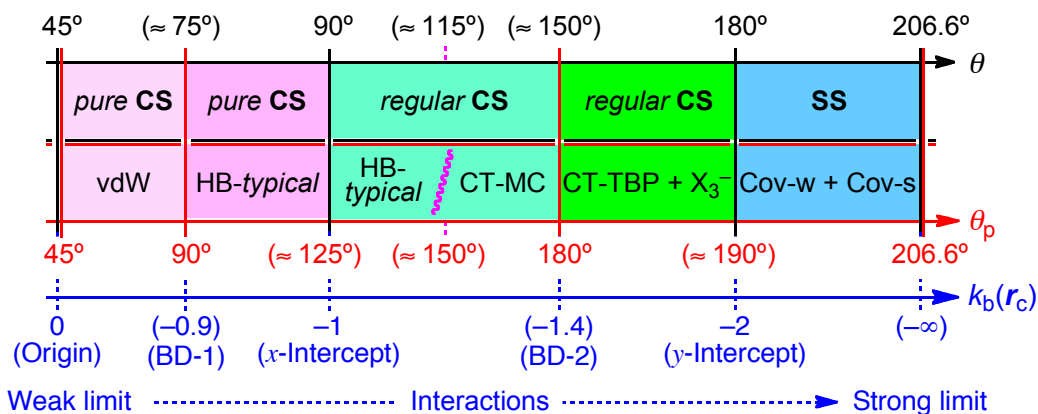

**Scheme S2.** Rough classification of interactions by  $\theta$  and  $\theta_p$ , together with  $k_b(\mathbf{r}_c) (= V_b(\mathbf{r}_c)/G_b(\mathbf{r}_c))$ .

**Table S1.** Optimization processes starting from type  $\text{II}_{\text{Atc}}$  of  $(\text{EH}_2)\text{---}\pi(\text{C}_{14}\text{H}_{10})$  (E = O, S, Se and Te).

| E  | Stating $\rightarrow$ Converged                                           | Stating $\rightarrow$ Converged                                           | Stating $\rightarrow$ Converged                                           |
|----|---------------------------------------------------------------------------|---------------------------------------------------------------------------|---------------------------------------------------------------------------|
| O  | type $\text{IIA}_{\text{Atc}} \rightarrow$ type $\text{IIA}_{\text{Atc}}$ | type $\text{IIB}_{\text{Atc}} \rightarrow$ type $\text{IIB}_{\text{Atc}}$ | type $\text{IIC}_{\text{Atc}} \rightarrow$ type $\text{IIB}_{\text{Atc}}$ |
| S  | type $\text{IIA}_{\text{Atc}} \rightarrow$ type $\text{IIA}_{\text{Atc}}$ | type $\text{IIB}_{\text{Atc}} \rightarrow$ type $\text{IIB}_{\text{Atc}}$ | type $\text{IIC}_{\text{Atc}} \rightarrow$ type $\text{IIB}_{\text{Atc}}$ |
| Se | type $\text{IIA}_{\text{Atc}} \rightarrow$ type $\text{IIB}_{\text{Atc}}$ | type $\text{IIB}_{\text{Atc}} \rightarrow$ type $\text{IIB}_{\text{Atc}}$ | type $\text{IIC}_{\text{Atc}} \rightarrow$ type $\text{IIB}_{\text{Atc}}$ |
| Te | type $\text{IIA}_{\text{Atc}} \rightarrow$ type $\text{IIB}_{\text{Atc}}$ | type $\text{IIB}_{\text{Atc}} \rightarrow$ type $\text{IIB}_{\text{Atc}}$ | type $\text{IIC}_{\text{Atc}} \rightarrow$ type $\text{IIB}_{\text{Atc}}$ |

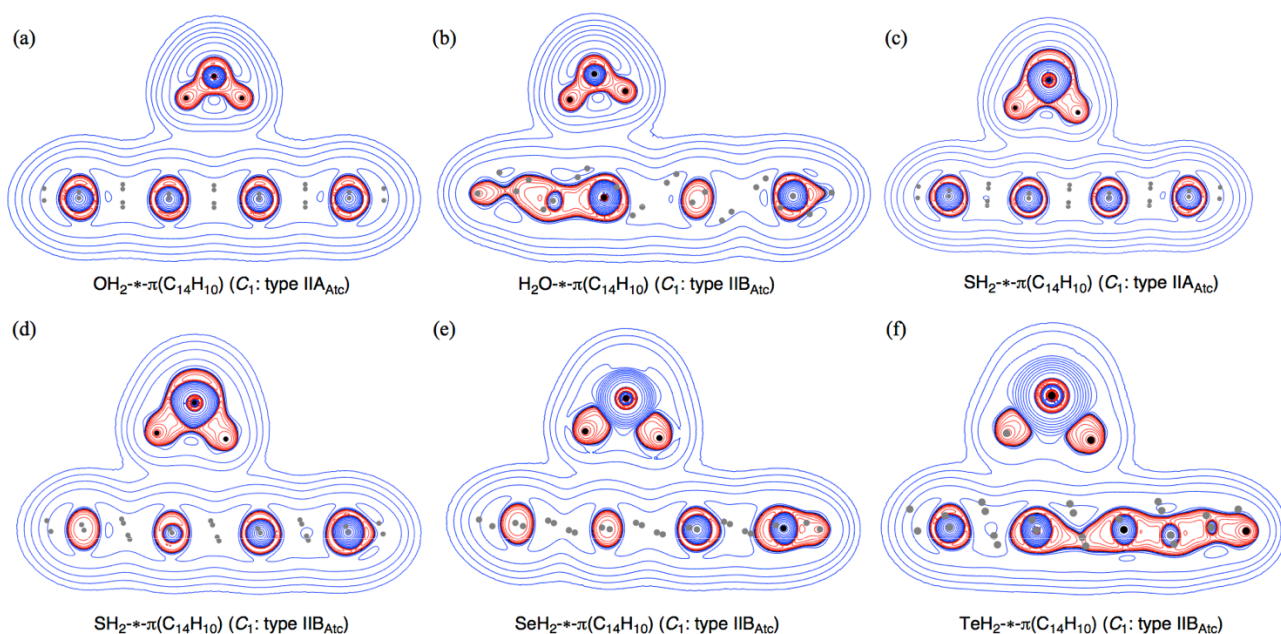**Figure S2.** Negative Laplacian for  $\text{OH}_2\text{---}\pi(\text{C}_{14}\text{H}_{10})$  ( $C_1$ : type  $\text{IIA}_{\text{Atc}}$ ) (a),  $\text{H}_2\text{O---}\pi(\text{C}_{14}\text{H}_{10})$  ( $C_1$ : type  $\text{IIB}_{\text{Atc}}$ ) (b),  $\text{SH}_2\text{---}\pi(\text{C}_{14}\text{H}_{10})$  ( $C_1$ : type  $\text{IIA}_{\text{Atc}}$ ) (c),  $\text{SH}_2\text{---}\pi(\text{C}_{14}\text{H}_{10})$  ( $C_1$ : type  $\text{IIB}_{\text{Atc}}$ ) (d),  $\text{SeH}_2\text{---}\pi(\text{C}_{14}\text{H}_{10})$  ( $C_1$ : type  $\text{IIB}_{\text{Atc}}$ ) (e) and  $\text{TeH}_2\text{---}\pi(\text{C}_{14}\text{H}_{10})$  ( $C_1$ : type  $\text{IIB}_{\text{Atc}}$ ), calculated with MP2/BSS-F. Positive and negative areas are shown by blue and red lines, respectively.

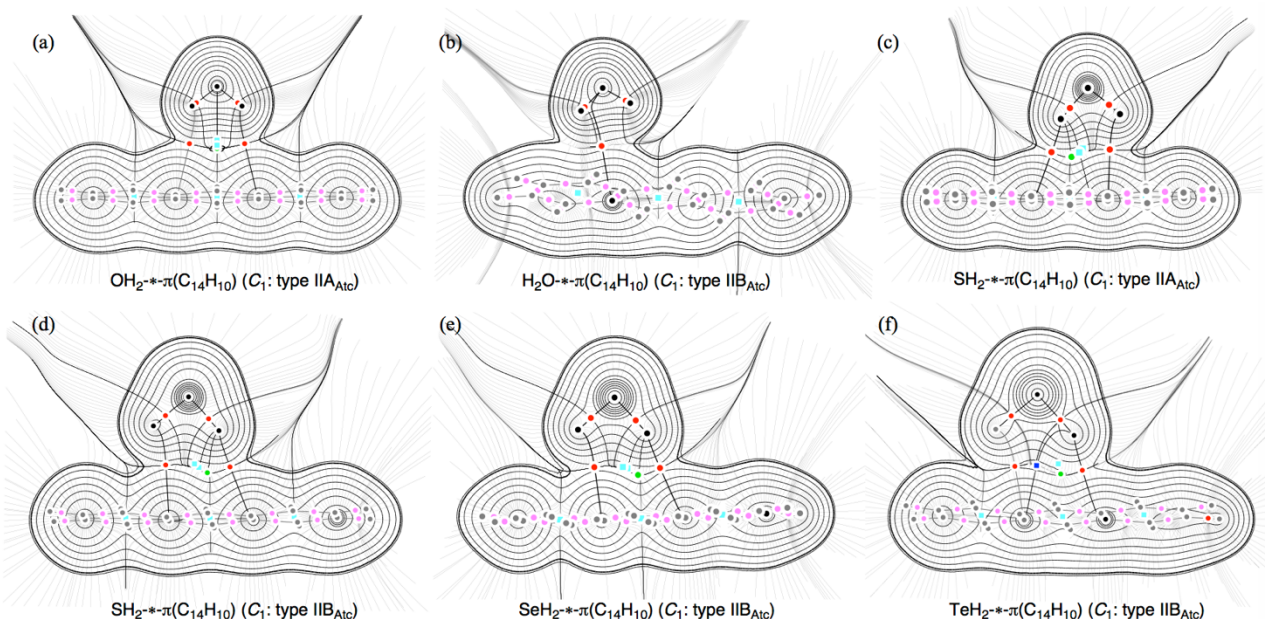

**Figure S3.** Trajectory plots for  $\text{OH}_2\text{-}\pi(\text{C}_{14}\text{H}_{10})$  ( $C_1$ : type  $\text{IIA}_{\text{Atc}}$ ) (a),  $\text{H}_2\text{O-}\pi(\text{C}_{14}\text{H}_{10})$  ( $C_1$ : type  $\text{IIB}_{\text{Atc}}$ ) (b),  $\text{SH}_2\text{-}\pi(\text{C}_{14}\text{H}_{10})$  ( $C_1$ : type  $\text{IIA}_{\text{Atc}}$ ) (c),  $\text{SH}_2\text{-}\pi(\text{C}_{14}\text{H}_{10})$  ( $C_1$ : type  $\text{IIB}_{\text{Atc}}$ ) (d),  $\text{SeH}_2\text{-}\pi(\text{C}_{14}\text{H}_{10})$  ( $C_1$ : type  $\text{IIB}_{\text{Atc}}$ ) (e) and  $\text{TeH}_2\text{-}\pi(\text{C}_{14}\text{H}_{10})$  ( $C_1$ : type  $\text{IIB}_{\text{Atc}}$ ), calculated with MP2/BSS-F. Colors are the same as those in Figure 3.

**Table S2.** Lengths of Bond Paths ( $r_{\text{BP}}$ ) with Components ( $r_{\text{BP-1}}$  and  $r_{\text{BP-2}}$ ) and Corresponding Straight line Distances ( $R_{\text{SL}}$ ) in  $(\text{EH}_2)\text{-}\pi(\text{C}_{14}\text{H}_{10})$  ( $\text{E} = \text{O}, \text{S}, \text{Se}$  and  $\text{Te}$ ), Evaluated at the MP2 with BSS-F<sup>a,b</sup>

| Interaction<br>( $\text{X-}\pi\text{-Y}$ ) <sup>d</sup>              | type <sup>c</sup>                      | $r_{\text{BP-1}}$<br>(Å) | $r_{\text{BP-2}}$<br>(Å) | $r_{\text{BP}}$<br>(Å) | $R_{\text{SL}}$<br>(Å) |
|----------------------------------------------------------------------|----------------------------------------|--------------------------|--------------------------|------------------------|------------------------|
| <b>OHH-}\pi(\text{C}_{14}\text{H}_{10})</b>                          | $\text{IIA}_{\text{Atc}}$ <sup>e</sup> | 1.1374                   | 1.7356                   | 2.8730                 | 2.7869                 |
| <b>H<sub>2</sub>O-}\pi(\text{C}_{14}\text{H}_{10})</b>               | $\text{IIB}_{\text{Atc}}$              | 1.8589                   | 1.6483                   | 3.5072                 | 3.3373                 |
| <b>S<sup>o</sup>H'H-}\pi(\text{C}_{14}\text{H}_{10})</b>             | $\text{IIA}_{\text{Atc}}$              | 1.2260                   | 1.6786                   | 2.7938                 | 2.7938                 |
| <b>S<sup>i</sup>H<sup>o</sup>H-}\pi(\text{C}_{14}\text{H}_{10})</b>  | $\text{IIA}_{\text{Atc}}$              | 1.1154                   | 1.7056                   | 2.8210                 | 2.7925                 |
| <b>S<sup>o</sup>H'H-}\pi(\text{C}_{14}\text{H}_{10})</b>             | $\text{IIB}_{\text{Atc}}$              | 1.1139                   | 1.7046                   | 2.8185                 | 2.7902                 |
| <b>S<sup>i</sup>H<sup>o</sup>H-}\pi(\text{C}_{14}\text{H}_{10})</b>  | $\text{IIB}_{\text{Atc}}$              | 1.2392                   | 1.7399                   | 2.9791                 | 2.8165                 |
| <b>Se<sup>o</sup>H'H-}\pi(\text{C}_{14}\text{H}_{10})</b>            | $\text{IIB}_{\text{Atc}}$              | 1.1114                   | 1.6842                   | 2.7956                 | 2.7696                 |
| <b>Se<sup>i</sup>H<sup>o</sup>H-}\pi(\text{C}_{14}\text{H}_{10})</b> | $\text{IIB}_{\text{Atc}}$              | 1.2697                   | 2.0024                   | 3.2721                 | 2.8572                 |
| <b>Te<sup>o</sup>H'H-}\pi(\text{C}_{14}\text{H}_{10})</b>            | $\text{IIB}_{\text{Atc}}$              | 1.0787                   | 1.6973                   | 2.7760                 | 2.6707                 |
| <b>Te<sup>i</sup>H<sup>o</sup>H-}\pi(\text{C}_{14}\text{H}_{10})</b> | $\text{IIB}_{\text{Atc}}$              | 1.3129                   | 1.6501                   | 2.9630                 | 2.8409                 |

<sup>a</sup> See “Methodological details in calculations” for BSSs. <sup>b</sup> See text for  $r_{\text{BP-1}}$  and  $r_{\text{BP-2}}$ , where  $r_{\text{BP}} = r_{\text{BP-1}} + r_{\text{BP-2}}$ .

<sup>c</sup> See Scheme 1 and Figures 1 and 2. <sup>d</sup> The optimized structure has the  $C_1$  symmetry and atoms taking part in the interaction are shown by bold with BCP denoted by \*. <sup>e</sup> Very close to the  $C_s$  symmetry.

## References

- S1 (a) *Atoms in Molecules. A Quantum Theory*, ed. R. F. W. Bader, Oxford University Press, Oxford, UK, 1990; (b) C. F. Matta and R. J. Boyd, *An Introduction to the Quantum Theory of Atoms in Molecules In The Quantum Theory of Atoms in Molecules: From Solid State to DNA and Drug Design*, eds. C. F. Matta and R. J. Boyd, Wiley-VCH, Weinheim, Germany, 2007, ch. 1.
- S2 (a) R. F. W. Bader, T. S. Slee, D. Cremer and E. Kraka, *J. Am. Chem. Soc.*, 1983, **105**, 5061–5068; (b) R. F. W. Bader, *Chem. Rev.*, 1991, **91**, 893–928; (c) R. F. W. Bader, *J. Phys. Chem. A*, 1998, **102**, 7314–7323; (d) F. W. Biegler-König, R. F. W. Bader and T. H. Tang, *J. Comput. Chem.*, 1982, **3**, 317–328; (e) R. F. W. Bader, *Acc. Chem. Res.*, 1985, **18**, 9–15; (f) T. H. Tang, R. F. W. Bader and P. MacDougall, *Inorg. Chem.*, 1985, **24**, 2047–2053; (g) F. Biegler-König, J. Schönbohm and D. Bayles, *J. Comput. Chem.*, 2001, **22**, 545–559; (h) F. Biegler-König and J. Schönbohm, *J. Comput. Chem.*, 2002, **23**, 1489–1494.
- S3 W. Nakanishi, T. Nakamoto, S. Hayashi, T. Sasamori and N. Tokitoh, *Chem. Eur. J.*, 2007, **13**, 255–268.
- S4 (a) W. Nakanishi, S. Hayashi and K. Narahara, *J. Phys. Chem. A*, 2009, **113**, 10050–10057; (b) W. Nakanishi, S. Hayashi and K. Narahara, *J. Phys. Chem. A*, 2008, **112**, 13593–13599.
- S5 W. Nakanishi and S. Hayashi, *Curr. Org. Chem.*, 2010, **14**, 181–197.
- S6 (a) W. Nakanishi and S. Hayashi, *J. Phys. Chem. A*, 2010, **114**, 7423–7430; (b) W. Nakanishi, S. Hayashi, K. Matsuiwa and M. Kitamoto, *Bull. Chem. Soc. Jpn.*, 2012, **85**, 1293–1305.

## Optimized structures given by Cartesian coordinates

The structures were optimized employing the Gaussian 09 programs.

|                      |                                                        |           |           |           |
|----------------------|--------------------------------------------------------|-----------|-----------|-----------|
| MP2/BSS-F            | C, H: 6-311++G(d,p), O: 6-311+G(3df)                   |           |           |           |
| Adduct               | OH <sub>2</sub> ---π(C <sub>14</sub> H <sub>10</sub> ) |           |           |           |
| Symmetry             | (C <sub>1</sub> : ΠA <sub>1g</sub> )                   |           |           |           |
| energy               | E = -614.3482466 au                                    |           |           |           |
| Standard orientation |                                                        |           |           |           |
| 6                    | 0                                                      | -0.000009 | -1.397290 | -0.363121 |
| 6                    | 0                                                      | 0.000006  | 1.418544  | -0.285819 |
| 1                    | 0                                                      | -0.000013 | -2.487335 | -0.369673 |
| 1                    | 0                                                      | 0.000012  | 2.508425  | -0.273680 |
| 6                    | 0                                                      | -1.226148 | -0.712974 | -0.308868 |
| 6                    | 0                                                      | -1.226144 | 0.733639  | -0.326399 |
| 6                    | 0                                                      | 1.226132  | -0.712992 | -0.308865 |
| 6                    | 0                                                      | 1.226147  | 0.733618  | -0.326397 |
| 6                    | 0                                                      | -2.478809 | -1.400560 | -0.341765 |
| 6                    | 0                                                      | -2.477685 | 1.420756  | -0.261479 |
| 1                    | 0                                                      | -2.477642 | -2.488808 | -0.357179 |
| 1                    | 0                                                      | -2.476430 | 2.508977  | -0.245013 |
| 6                    | 0                                                      | 2.478799  | -1.400565 | -0.341773 |
| 6                    | 0                                                      | 2.477681  | 1.420748  | -0.261482 |
| 1                    | 0                                                      | 2.477649  | -2.488813 | -0.357188 |
| 1                    | 0                                                      | 2.476408  | 2.508969  | -0.245015 |
| 6                    | 0                                                      | -3.666706 | -0.702509 | -0.293096 |
| 6                    | 0                                                      | -3.666520 | 0.722691  | -0.272160 |
| 1                    | 0                                                      | -4.611657 | -1.239496 | -0.304196 |
| 1                    | 0                                                      | -4.610704 | 1.259548  | -0.230784 |
| 6                    | 0                                                      | 3.666696  | -0.702510 | -0.293110 |
| 6                    | 0                                                      | 3.666518  | 0.722690  | -0.272172 |
| 1                    | 0                                                      | 4.611648  | -1.239494 | -0.304221 |
| 1                    | 0                                                      | 4.610700  | 1.259551  | -0.230801 |
| 8                    | 0                                                      | 0.000029  | -0.095328 | 2.964906  |
| 1                    | 0                                                      | -0.756121 | -0.099464 | 2.368767  |
| 1                    | 0                                                      | 0.756184  | -0.099156 | 2.368771  |

|                      |                                                        |           |           |           |
|----------------------|--------------------------------------------------------|-----------|-----------|-----------|
| MP2/BSS-F            | C, H: 6-311++G(d,p), O: 6-311+G(3df)                   |           |           |           |
| Adduct               | OH <sub>2</sub> ---π(C <sub>14</sub> H <sub>10</sub> ) |           |           |           |
| Symmetry             | (C <sub>1</sub> : ΠB <sub>1g</sub> )                   |           |           |           |
| energy               | E = -614.347928 au                                     |           |           |           |
| Standard orientation |                                                        |           |           |           |
| 6                    | 0                                                      | -0.178929 | -1.379624 | -0.388904 |
| 6                    | 0                                                      | -0.188318 | 1.431633  | -0.215095 |
| 1                    | 0                                                      | -0.171940 | -2.468808 | -0.430676 |
| 1                    | 0                                                      | -0.193269 | 2.520651  | -0.167808 |
| 6                    | 0                                                      | -1.399992 | -0.707952 | -0.210575 |
| 6                    | 0                                                      | -1.409671 | 0.737792  | -0.173803 |
| 6                    | 0                                                      | 1.042372  | -0.686116 | -0.422961 |
| 6                    | 0                                                      | 1.033340  | 0.759974  | -0.391048 |
| 6                    | 0                                                      | -2.646853 | -1.404716 | -0.167363 |
| 6                    | 0                                                      | -2.655855 | 1.411831  | 0.012612  |
| 1                    | 0                                                      | -2.640531 | -2.491753 | -0.219761 |
| 1                    | 0                                                      | -2.659848 | 2.498895  | 0.065376  |
| 6                    | 0                                                      | 2.292615  | -1.362027 | -0.573807 |
| 6                    | 0                                                      | 2.280753  | 1.456491  | -0.417065 |
| 1                    | 0                                                      | 2.297192  | -2.449308 | -0.624517 |
| 1                    | 0                                                      | 2.274109  | 2.543539  | -0.364833 |
| 6                    | 0                                                      | -3.831360 | -0.718974 | -0.003106 |
| 6                    | 0                                                      | -3.838029 | 0.704654  | 0.064954  |
| 1                    | 0                                                      | -4.771355 | -1.263068 | 0.039007  |

|   |   |           |           |           |
|---|---|-----------|-----------|-----------|
| 1 | 0 | -4.779537 | 1.231693  | 0.196199  |
| 6 | 0 | 3.477104  | -0.654920 | -0.603295 |
| 6 | 0 | 3.469979  | 0.769559  | -0.540176 |
| 1 | 0 | 4.421533  | -1.183949 | -0.702714 |
| 1 | 0 | 4.410928  | 1.313039  | -0.562551 |
| 8 | 0 | 1.740932  | -0.246231 | 2.810603  |
| 1 | 0 | 0.892072  | -0.023805 | 2.415520  |
| 1 | 0 | 2.310255  | -0.402922 | 2.049721  |

MP2/BSS-F C, H: 6-311++G(d,p), S: 6-311+G(3df)  
 Adduct SH<sub>2</sub>---π(C<sub>14</sub>H<sub>10</sub>)  
 Symmetry (C<sub>1</sub>: ΠA<sub>A1c</sub>)  
 energy E = -936.9261462 au  
 Standard orientation

|    |   |           |           |           |
|----|---|-----------|-----------|-----------|
| 6  | 0 | -0.140977 | -0.609500 | -1.395343 |
| 6  | 0 | -0.140592 | -0.550848 | 1.421086  |
| 1  | 0 | -0.141934 | -0.645774 | -2.484781 |
| 1  | 0 | -0.137794 | -0.502771 | 2.510153  |
| 6  | 0 | 1.079789  | -0.709030 | -0.707586 |
| 6  | 0 | 1.083801  | -0.621540 | 0.735964  |
| 6  | 0 | -1.364743 | -0.517796 | -0.711217 |
| 6  | 0 | -1.360141 | -0.434650 | 0.733113  |
| 6  | 0 | 2.330416  | -0.752894 | -1.396351 |
| 6  | 0 | 2.333105  | -0.691343 | 1.425186  |
| 1  | 0 | 2.327439  | -0.788454 | -2.484174 |
| 1  | 0 | 2.333276  | -0.653081 | 2.513002  |
| 6  | 0 | -2.609166 | -0.390585 | -1.402411 |
| 6  | 0 | -2.609272 | -0.329638 | 1.419515  |
| 1  | 0 | -2.609047 | -0.427039 | -2.490249 |
| 1  | 0 | -2.606606 | -0.293231 | 2.507339  |
| 6  | 0 | 3.519173  | -0.790253 | -0.698133 |
| 6  | 0 | 3.521290  | -0.740629 | 0.726356  |
| 1  | 0 | 4.463093  | -0.827428 | -1.235948 |
| 1  | 0 | 4.465493  | -0.775086 | 1.263986  |
| 6  | 0 | -3.793002 | -0.269793 | -0.706274 |
| 6  | 0 | -3.791491 | -0.222785 | 0.718394  |
| 1  | 0 | -4.732560 | -0.181848 | -1.245771 |
| 1  | 0 | -4.732917 | -0.130027 | 1.253798  |
| 16 | 0 | 0.722724  | 2.936815  | -0.069643 |
| 1  | 0 | 1.691968  | 2.025522  | 0.081455  |
| 1  | 0 | -0.233136 | 1.997889  | -0.048319 |

MP2/BSS-F C, H: 6-311++G(d,p), S: 6-311+G(3df)  
 Adduct SH<sub>2</sub>---π(C<sub>14</sub>H<sub>10</sub>)  
 Symmetry (C<sub>1</sub>: ΠB<sub>A1c</sub>)  
 energy E = -936.9261451 au  
 Standard orientation

|   |   |           |           |           |
|---|---|-----------|-----------|-----------|
| 6 | 0 | 0.139670  | -0.570426 | 1.408587  |
| 6 | 0 | 0.141309  | -0.590421 | -1.408364 |
| 1 | 0 | 0.139753  | -0.576137 | 2.498618  |
| 1 | 0 | 0.139343  | -0.572531 | -2.498335 |
| 6 | 0 | -1.080601 | -0.688838 | 0.722889  |
| 6 | 0 | -1.083623 | -0.641870 | -0.722554 |
| 6 | 0 | 1.363938  | -0.498127 | 0.723136  |
| 6 | 0 | 1.360382  | -0.455152 | -0.722954 |
| 6 | 0 | -2.331800 | -0.712822 | 1.411735  |
| 6 | 0 | -2.332373 | -0.731482 | -1.410428 |
| 1 | 0 | -2.329630 | -0.717501 | 2.500154  |
| 1 | 0 | -2.331712 | -0.723477 | -2.498855 |
| 6 | 0 | 2.607867  | -0.351885 | 1.411420  |
| 6 | 0 | 2.610040  | -0.369533 | -1.411121 |
| 1 | 0 | 2.606932  | -0.357959 | 2.499844  |



|    |   |           |           |           |
|----|---|-----------|-----------|-----------|
| 1  | 0 | 2.608192  | -0.363552 | -2.499544 |
| 6  | 0 | -3.520092 | -0.769243 | 0.713888  |
| 6  | 0 | -3.521085 | -0.760690 | -0.711469 |
| 1  | 0 | -4.464404 | -0.791187 | 1.251893  |
| 1  | 0 | -4.464895 | -0.810221 | -1.248572 |
| 6  | 0 | 3.792225  | -0.250635 | 0.713050  |
| 6  | 0 | 3.791762  | -0.243357 | -0.712374 |
| 1  | 0 | 4.731401  | -0.147720 | 1.250554  |
| 1  | 0 | 4.733597  | -0.165755 | -1.249473 |
| 16 | 0 | -0.720748 | 2.938337  | 0.001265  |
| 1  | 0 | -1.695816 | 2.021823  | -0.042407 |
| 1  | 0 | 0.233509  | 1.997721  | -0.016767 |

MP2/BSS-F C, H: 6-311++G(d,p), Se: 6-311+G(3df)  
 Adduct SeH<sub>2</sub>---π(C<sub>14</sub>H<sub>10</sub>)  
 Symmetry (C<sub>1</sub>:  $\bar{\Gamma}$ B<sub>Atc</sub>)  
 energy E = -2939.3326286 au  
 Standard orientation

|    |   |           |           |           |
|----|---|-----------|-----------|-----------|
| 6  | 0 | 0.401446  | -0.931680 | 1.413971  |
| 6  | 0 | 0.411757  | -0.986420 | -1.402520 |
| 1  | 0 | 0.399670  | -0.922838 | 2.504033  |
| 1  | 0 | 0.409406  | -0.981661 | -2.492659 |
| 6  | 0 | -0.790188 | -1.221655 | 0.729163  |
| 6  | 0 | -0.796553 | -1.193303 | -0.716738 |
| 6  | 0 | 1.605579  | -0.700263 | 0.728198  |
| 6  | 0 | 1.599435  | -0.677121 | -0.718348 |
| 6  | 0 | -2.028470 | -1.401344 | 1.417968  |
| 6  | 0 | -2.021080 | -1.454140 | -1.403896 |
| 1  | 0 | -2.028228 | -1.390027 | 2.506415  |
| 1  | 0 | -2.019231 | -1.459582 | -2.492356 |
| 6  | 0 | 2.815594  | -0.374550 | 1.415213  |
| 6  | 0 | 2.826399  | -0.426658 | -1.407007 |
| 1  | 0 | 2.812792  | -0.366639 | 2.503622  |
| 1  | 0 | 2.826300  | -0.435289 | -2.495418 |
| 6  | 0 | -3.198939 | -1.615625 | 0.720175  |
| 6  | 0 | -3.197505 | -1.628367 | -0.705141 |
| 1  | 0 | -4.133618 | -1.752969 | 1.258063  |
| 1  | 0 | -4.126167 | -1.804816 | -1.241957 |
| 6  | 0 | 3.975743  | -0.117494 | 0.716158  |
| 6  | 0 | 3.977686  | -0.129295 | -0.709248 |
| 1  | 0 | 4.890386  | 0.121362  | 1.252758  |
| 1  | 0 | 4.900691  | 0.072376  | -1.246811 |
| 34 | 0 | -1.046596 | 2.447013  | -0.015536 |
| 1  | 0 | -1.950524 | 1.303187  | 0.057552  |
| 1  | 0 | 0.117373  | 1.565937  | -0.052690 |

MP2/BSS-F C, H: 6-311++G(d,p), Te: 7433111/743111/7411/2 + 1s1p1d1f  
 Adduct TeH<sub>2</sub>---π(C<sub>14</sub>H<sub>10</sub>)  
 Symmetry (C<sub>1</sub>:  $\bar{\Gamma}$ B<sub>Atc</sub>)  
 energy E = -7151.0717911 au  
 Standard orientation

|   |   |           |          |           |
|---|---|-----------|----------|-----------|
| 6 | 0 | -0.770553 | 1.069753 | 1.431082  |
| 6 | 0 | -0.824912 | 1.223579 | -1.381140 |
| 1 | 0 | -0.753568 | 1.021268 | 2.520016  |
| 1 | 0 | -0.835940 | 1.261392 | -2.470791 |
| 6 | 0 | 0.336274  | 1.605117 | 0.752193  |
| 6 | 0 | 0.330505  | 1.630828 | -0.693755 |
| 6 | 0 | -1.915861 | 0.636627 | 0.743054  |
| 6 | 0 | -1.922340 | 0.665670 | -0.703271 |
| 6 | 0 | 1.527457  | 1.985381 | 1.441317  |
| 6 | 0 | 1.477227  | 2.138438 | -1.376562 |
| 1 | 0 | 1.541825  | 1.934028 | 2.528516  |

|    |   |           |           |           |
|----|---|-----------|-----------|-----------|
| 1  | 0 | 1.461145  | 2.185128  | -2.464100 |
| 6  | 0 | -3.028958 | 0.053272  | 1.422849  |
| 6  | 0 | -3.085282 | 0.206069  | -1.394962 |
| 1  | 0 | -3.011025 | 0.006225  | 2.510175  |
| 1  | 0 | -3.100519 | 0.254650  | -2.482298 |
| 6  | 0 | 2.630217  | 2.437174  | 0.746665  |
| 6  | 0 | 2.610223  | 2.500208  | -0.676992 |
| 1  | 0 | 3.530333  | 2.723835  | 1.284704  |
| 1  | 0 | 3.484219  | 2.864257  | -1.211400 |
| 6  | 0 | -4.124953 | -0.401148 | 0.720426  |
| 6  | 0 | -4.146784 | -0.338171 | -0.703423 |
| 1  | 0 | -4.967661 | -0.835766 | 1.251997  |
| 1  | 0 | -5.019004 | -0.697204 | -1.243806 |
| 52 | 0 | 1.366729  | -1.950372 | -0.029304 |
| 1  | 0 | 2.150236  | -0.515541 | -0.303458 |
| 1  | 0 | -0.103492 | -1.259703 | -0.360648 |

MP2/BSS-F' C, H: 6-311+G(d,p), S: 6-311+G(3df)  
 Adduct SH<sub>2</sub>---π(C<sub>14</sub>H<sub>10</sub>)  
 Symmetry (C<sub>1</sub>: ΠA<sub>Atc</sub>)  
 energy E = -936.925122 au  
 Standard orientation

|    |   |           |           |           |
|----|---|-----------|-----------|-----------|
| 6  | 0 | 0.045237  | -0.539578 | 1.423183  |
| 6  | 0 | 0.046200  | -0.643211 | -1.391883 |
| 1  | 0 | 0.045037  | -0.507749 | 2.512850  |
| 1  | 0 | 0.045802  | -0.662222 | -2.481953 |
| 6  | 0 | -1.179412 | -0.615314 | 0.739368  |
| 6  | 0 | -1.180036 | -0.611205 | -0.707082 |
| 6  | 0 | 1.271472  | -0.552718 | 0.737928  |
| 6  | 0 | 1.270379  | -0.550581 | -0.708740 |
| 6  | 0 | -2.430826 | -0.555434 | 1.426141  |
| 6  | 0 | -2.431650 | -0.673722 | -1.393365 |
| 1  | 0 | -2.429094 | -0.522242 | 2.514122  |
| 1  | 0 | -2.430461 | -0.703870 | -2.481472 |
| 6  | 0 | 2.519881  | -0.434982 | 1.423121  |
| 6  | 0 | 2.523021  | -0.554065 | -1.396496 |
| 1  | 0 | 2.517879  | -0.401485 | 2.511094  |
| 1  | 0 | 2.522020  | -0.585213 | -2.484558 |
| 6  | 0 | -3.620139 | -0.587921 | 0.728909  |
| 6  | 0 | -3.620474 | -0.630996 | -0.695785 |
| 1  | 0 | -4.564615 | -0.548930 | 1.265660  |
| 1  | 0 | -4.565322 | -0.661706 | -1.232435 |
| 6  | 0 | 3.708442  | -0.414000 | 0.724585  |
| 6  | 0 | 3.709205  | -0.458749 | -0.700095 |
| 1  | 0 | 4.650817  | -0.332668 | 1.260255  |
| 1  | 0 | 4.653922  | -0.446212 | -1.237674 |
| 16 | 0 | -0.234083 | 3.009250  | -0.073922 |
| 1  | 0 | -1.207728 | 2.090764  | -0.114978 |
| 1  | 0 | 0.719266  | 2.068388  | -0.106903 |
